# Supplementary material for: The role of HER2 and HER3 in HER2-amplified cancers beyond breast cancers
Source: PubMed Central journal article supplement (PMC8079373; doi:10.1038/s41598-021-88683-w), 2021-04-27

**Title**

The role of HER2 and HER3 in HER2-amplified cancers beyond breast cancers

**Authors**

Avishek Majumder<sup>1</sup>, Manbir Sandhu<sup>2</sup>, Debarko Banerji<sup>3</sup>, Veronica Steri<sup>4</sup>, Adam Olshen<sup>4,5</sup>, Mark M. Moasser<sup>1,4</sup>

**Supplementary Materials**

**Supplementary Table 1**

**Supplementary Full gel figures**

## Supplementary Table 1

### Sources of the cell lines

|           | Source                    | Location           | comments                                        |
|-----------|---------------------------|--------------------|-------------------------------------------------|
| T47D      | ATCC                      | Manassas, Virginia |                                                 |
| MDA-231   | ATCC                      | Manassas, Virginia |                                                 |
| MCF-7     | ATCC                      | Manassas, Virginia | authenticated June 2019; Genetica Cell Line te  |
| SkBr3     | ATCC                      | Manassas, Virginia | authenticated June 2019; Genetica Cell Line te  |
| BT474     | ATCC                      | Manassas, Virginia | authenticated June 2019; Genetica Cell Line te  |
| MDA-361   | ATCC                      | Manassas, Virginia |                                                 |
| MDA-453   | ATCC                      | Manassas, Virginia |                                                 |
| HCC1569   | ATCC                      | Manassas, Virginia | authenticated June 2019; Genetica Cell Line te  |
| HCC1954   | ATCC                      | Manassas, Virginia |                                                 |
| HCC1419   | ATCC                      | Manassas, Virginia |                                                 |
| UACC732   | ATCC                      | Manassas, Virginia |                                                 |
| SUM190    | Asterand                  | Detroit, MI        |                                                 |
| T24       | ATCC                      | Manassas, Virginia |                                                 |
| CLS-439   | Cell Line Service         | Eppelheim, Germany | within 6 months of purchase                     |
| HCT116    | gift of Michael Korn      | UCSF               |                                                 |
| HT29      | ATCC                      | Manassas, Virginia | within 6 months of purchase                     |
| M090      | gift of Livio Trusolini   | Univ of Turin      | (converted from PDX, not a published cell line) |
| AGS       | ATCC                      | Manassas, Virginia | within 6 months of purchase                     |
| KatoIII   | ATCC                      | Manassas, Virginia | within 6 months of purchase                     |
| SNU-1     | ATCC                      | Manassas, Virginia | within 6 months of purchase                     |
| SNU-5     | ATCC                      | Manassas, Virginia | within 6 months of purchase                     |
| SNU-16    | ATCC                      | Manassas, Virginia | within 6 months of purchase                     |
| MKN7      | JCRB Cell Bank            | Osaka, Japan       | within 6 months of purchase                     |
| N87       | ATCC                      | Manassas, Virginia | within 6 months of purchase                     |
| OE19      | gift of Michael Korn      | UCSF               |                                                 |
| TE-7      | gift of Michael Korn      | UCSF               |                                                 |
| OE-21     | gift of Michael Korn      | UCSF               |                                                 |
| BIC-1     | gift of Michael Korn      | UCSF               |                                                 |
| SEG-1     | gift of Michael Korn      | UCSF               |                                                 |
| TE-4      | Riken BRC                 | Ibaraki, Japan     | within 6 months of purchase                     |
| OE-33     | gift of Michael Korn      | UCSF               |                                                 |
| KYSE-410  | SigmaAldrich              | St. Louis, MO      | within 6 months of purchase                     |
| H460      | gift of David Jablons     | UCSF               |                                                 |
| H1703     | gift of David Jablons     | UCSF               |                                                 |
| H838      | gift of David Jablons     | UCSF               |                                                 |
| VMRCLCP   | JCRB Cell Bank            | Osaka, Japan       | within 6 months of purchase                     |
| H2170     | ATCC                      | Manassas, Virginia | within 6 months of purchase                     |
| Calu3     | gift of Trever Bivona     | UCSF               |                                                 |
| Cal27     | ATCC                      | Manassas, Virginia | within 6 months of purchase                     |
| BICR-16   | SigmaAldrich              | St. Louis, MO      | within 6 months of purchase                     |
| TEN       | Riken BRC, Ibaraki, Japan |                    | within 6 months of purchase                     |
| USPC-ARK1 | gift of Allesandro Santin | Yale               |                                                 |
| USPC-ARK2 | gift of Allesandro Santin | Yale               |                                                 |
| USPC-ARK4 | gift of Allesandro Santin | Yale               |                                                 |
| USPC-ARK7 | gift of Allesandro Santin | Yale               |                                                 |
| Hec1A     | gift of Linda Guidice     | UCSF               |                                                 |

ATCC = American Type Culture Collection

JCRB = Japanese Collection of Research Bioresources

Riken BRC = Riken Bioresource Center

# Supplementary information

(Full Western blot images for main figures in the paper)

# Full-blot for Figure 5

Fig.5: SUM190 cells

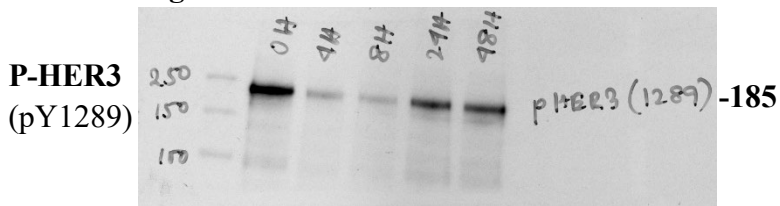

Fig.5: HCC1419 cells

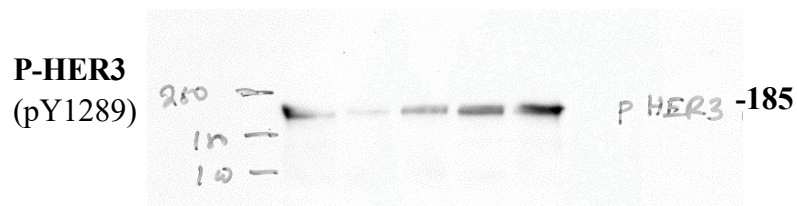

Fig.5: SUM190 cells

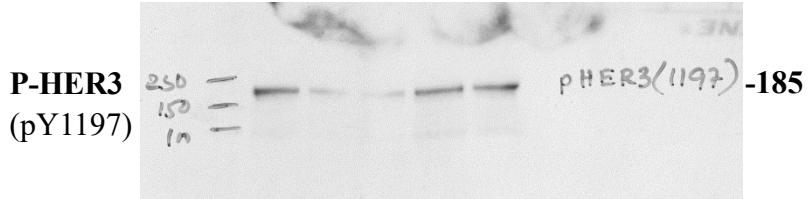

Fig.5: HCC1419 cells

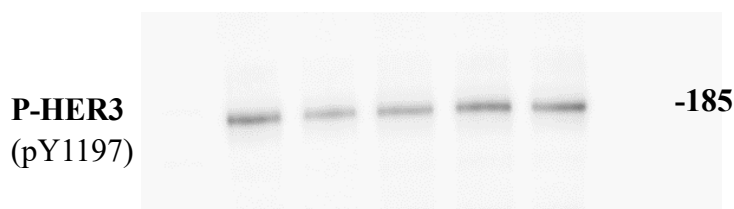

Fig.5: SUM190 cells

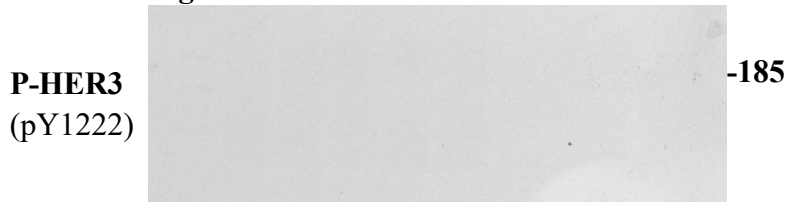

Fig.5: HCC1419 cells

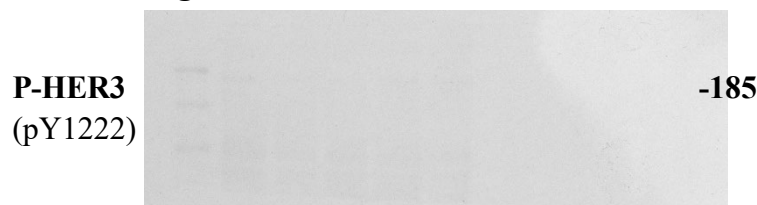

Fig.5: SUM190 cells

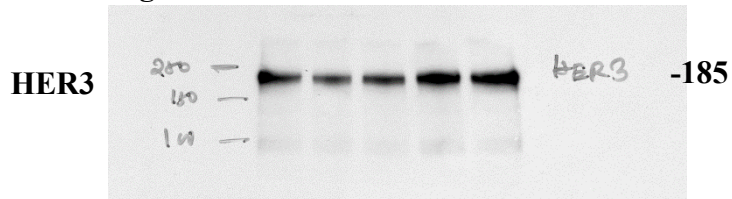

Fig.5: HCC1419 cells

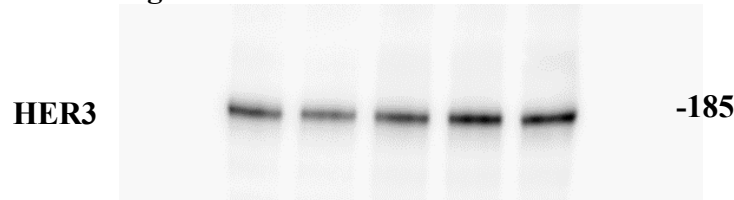

Fig.5: SUM190 cells

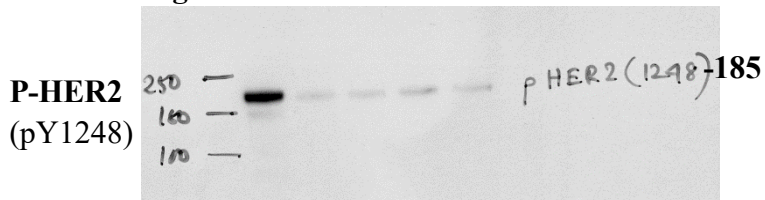

Fig.5: HCC1419 cells

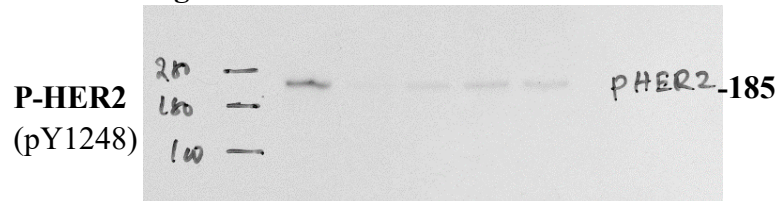

Fig.5: SUM190 cells

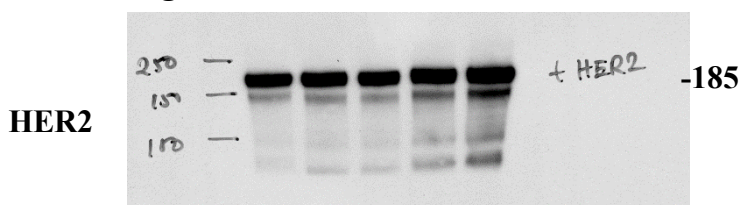

Fig.5: HCC1419 cells

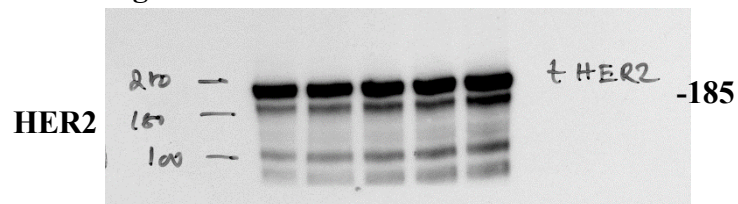

Fig.5: SUM190 cells

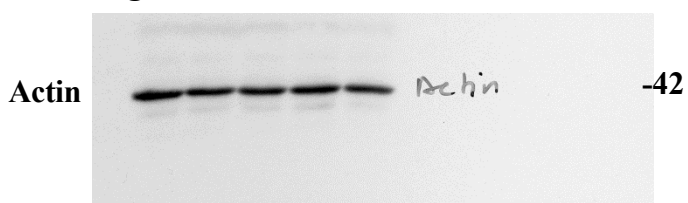

Fig.5: HCC1419 cells

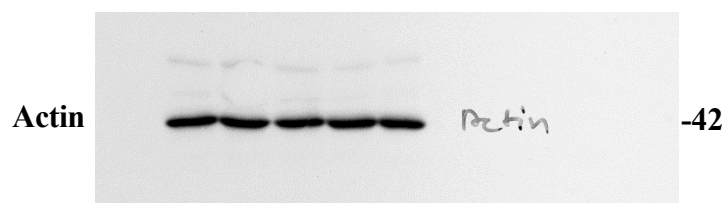

# Full-blot for Figure 5

Fig.5: HCC1954 cells

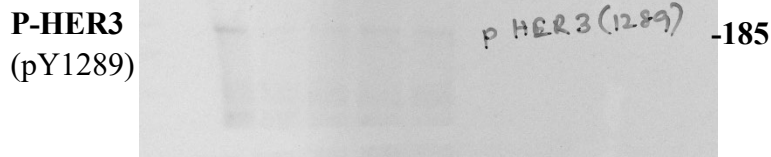

Fig.5: HCC1569 cells

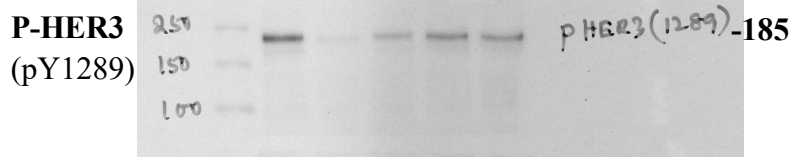

Fig.5: HCC1954 cells

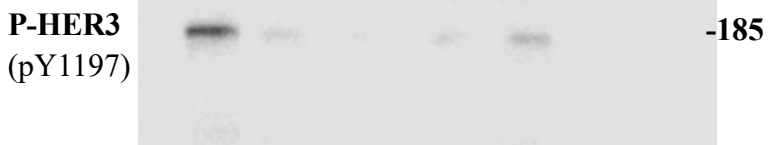

Fig.5: HCC1569 cells

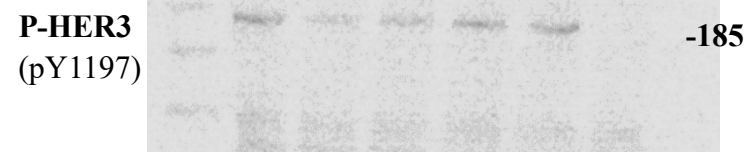

Fig.5: HCC1954 cells

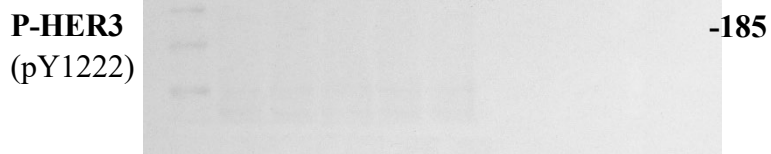

Fig.5: HCC1569 cells

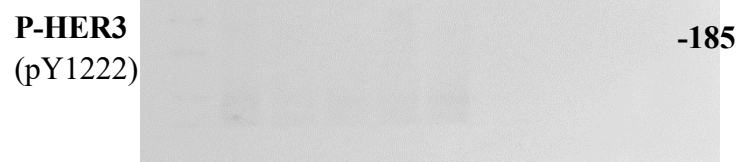

Fig.5: HCC1954 cells

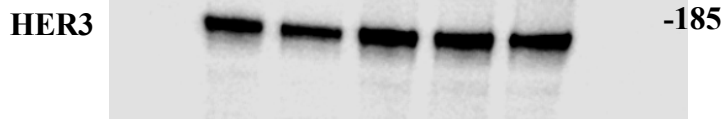

Fig.5: HCC1569 cells

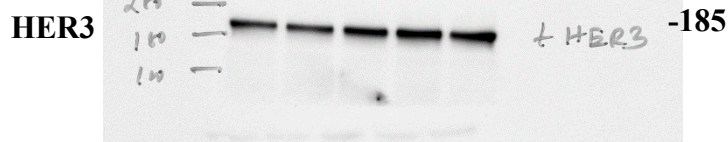

Fig.5: HCC1954 cells

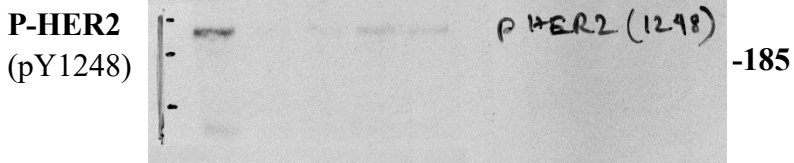

Fig.5: HCC1569 cells

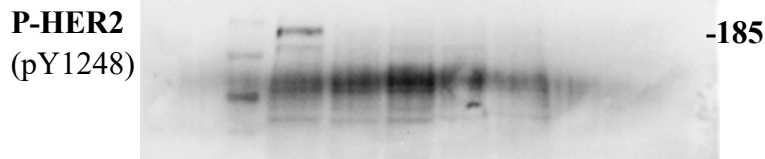

Fig.5: HCC1954 cells

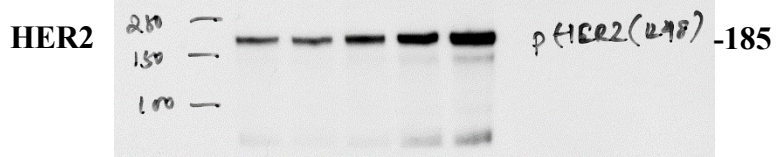

Fig.5: HCC1569 cells

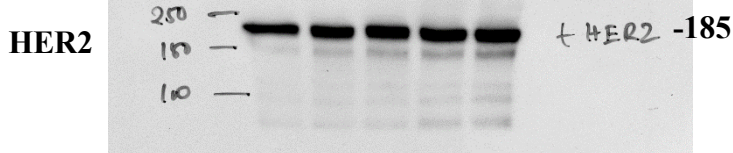

Fig.5: HCC1954 cells

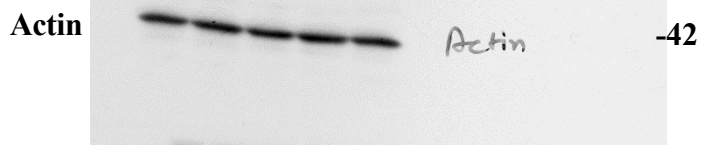

Fig.5: HCC1569 cells

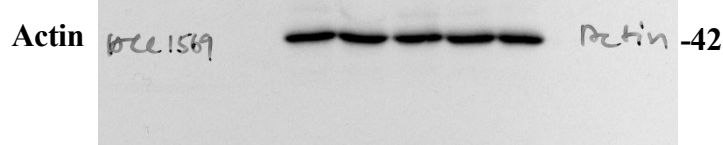

# Full-blot for Figure 5

Fig.5: UACC732 cells

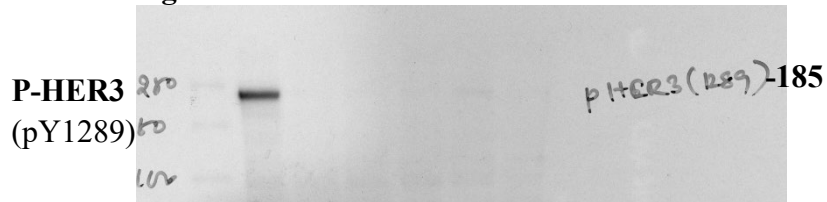

Fig.5: CLS-439 cells

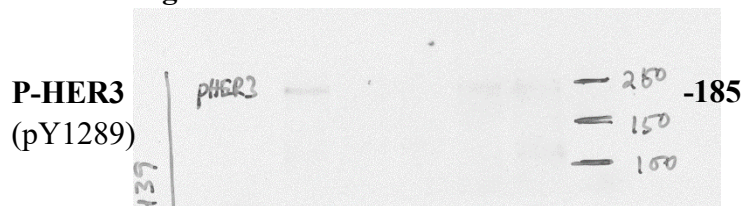

Fig.5: UACC732 cells

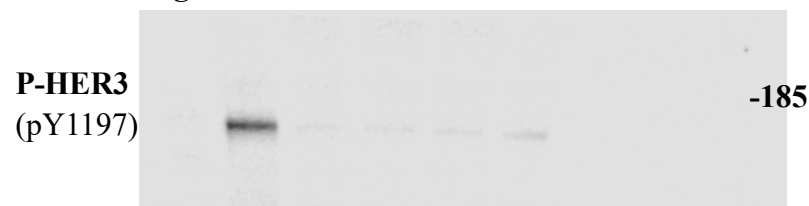

Fig.5: CLS-439 cells

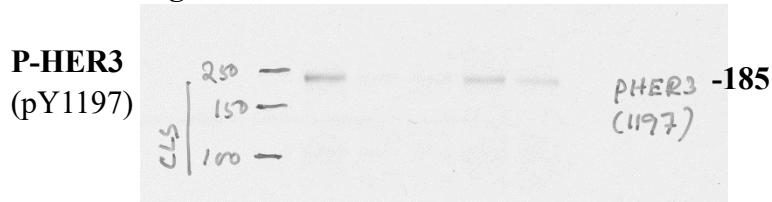

Fig.5: UACC732 cells

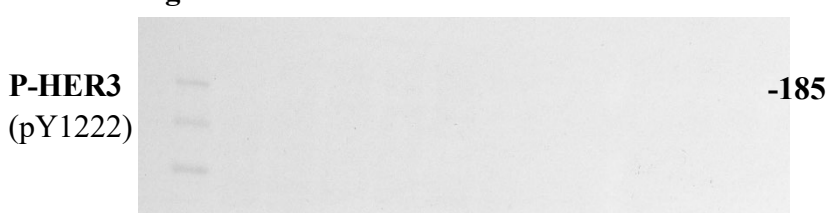

Fig.5: CLS-439 cells

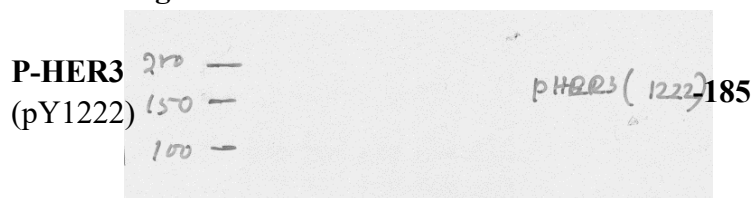

Fig.5: UACC732 cells

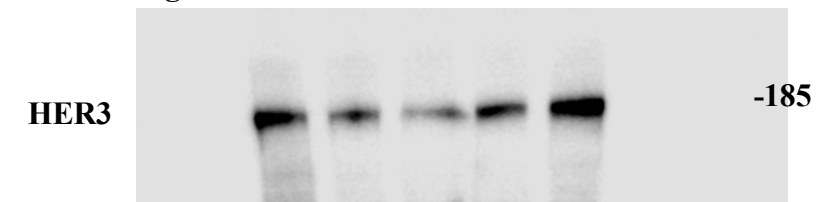

Fig.5: CLS-439 cells

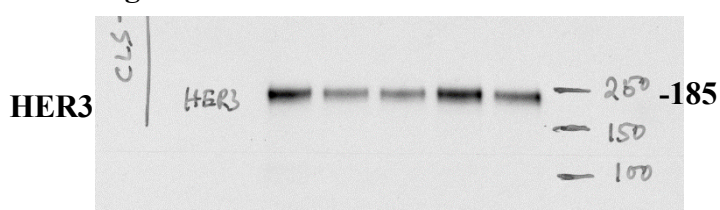

Fig.5: UACC732 cells

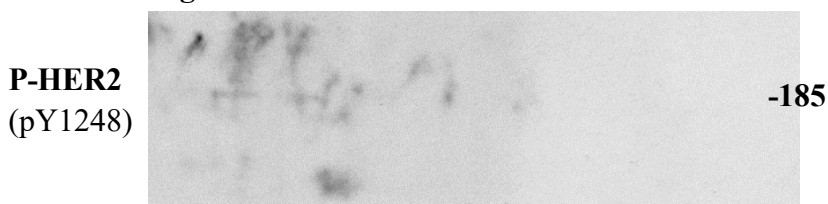

Fig.5: CLS-439 cells

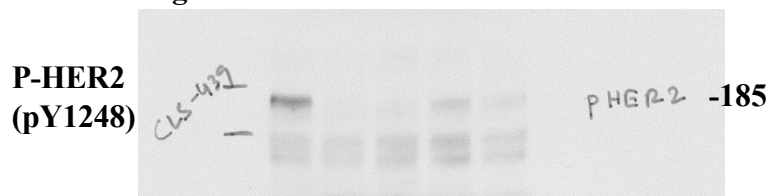

Fig.5: UACC732 cells

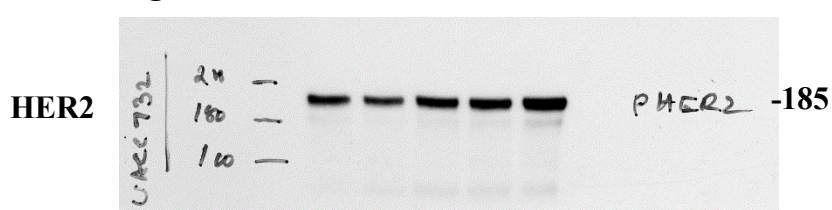

Fig.5: CLS-439 cells

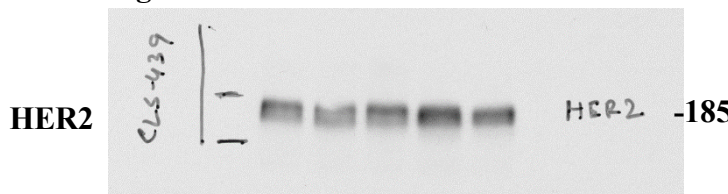

Fig.5: UACC732 cells

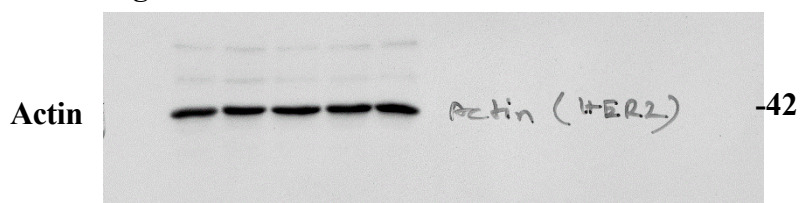

Fig.5: CLS-439 cells

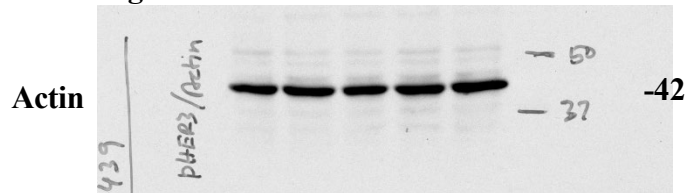

# Full-blot for Figure 5

Fig.5: M090 cells

P-HER3 (pY1289) -185

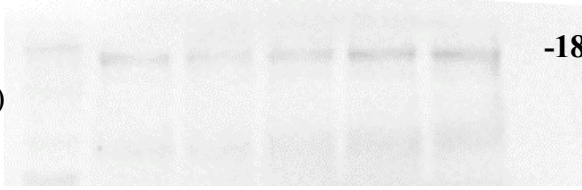

Fig.5: MKN-7 cells

P-HER3 (pY1289)

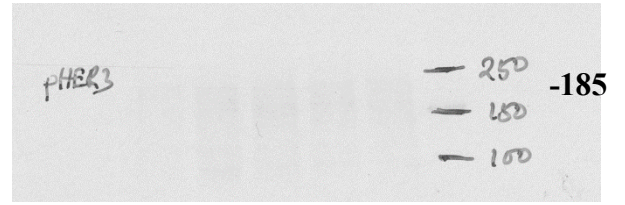

Fig.5: M090 cells

P-HER3 (pY1197) -185

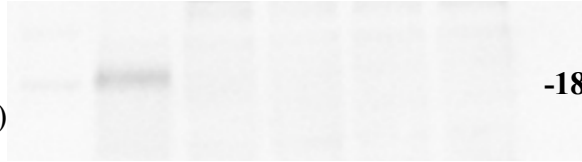

Fig.5: MKN-7 cells

P-HER3 (pY1197)

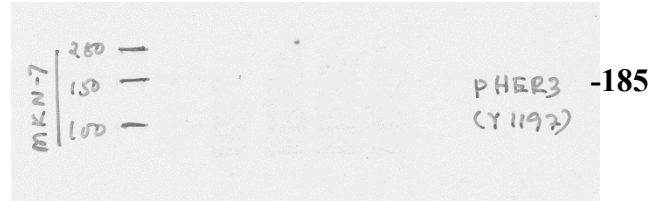

Fig.5: M090 cells

P-HER3 (pY1222) -185

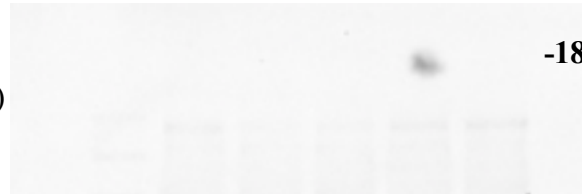

Fig.5: MKN-7 cells

P-HER3 (pY1222)

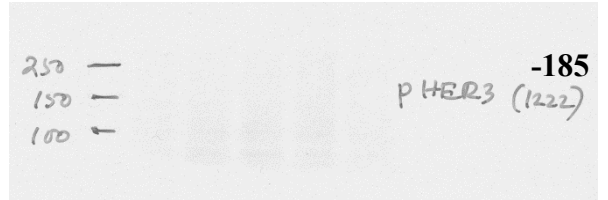

Fig.5: M090 cells

HER3 -185

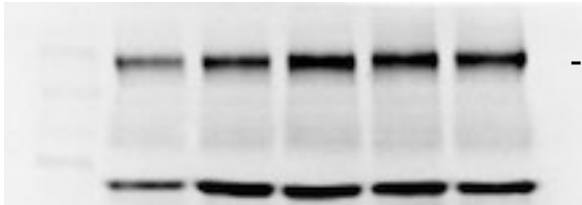

Fig.5: MKN-7 cells

HER3

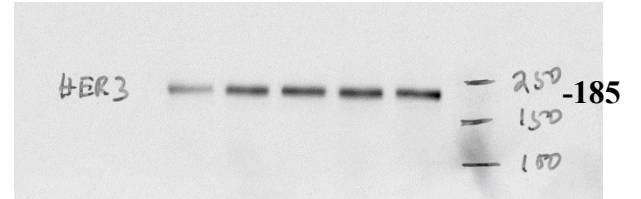

Fig.5: M090 cells

P-HER2 (pY1248) -185

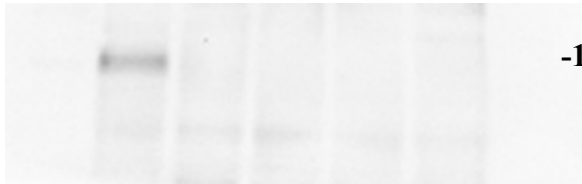

Fig.5: MKN-7 cells

P-HER2 (pY1248)

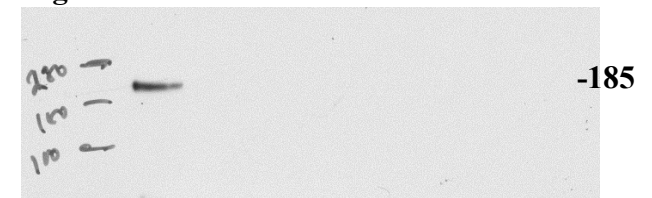

Fig.5: M090 cells

HER2 -185

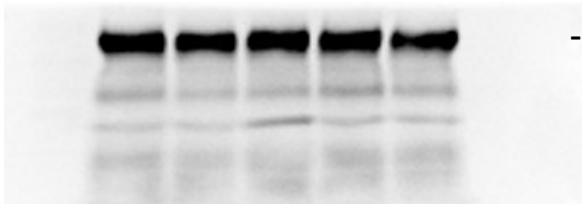

Fig.5: MKN-7 cells

HER2

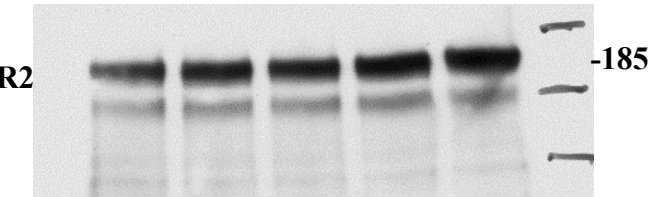

Fig.5: M090 cells

Actin -42

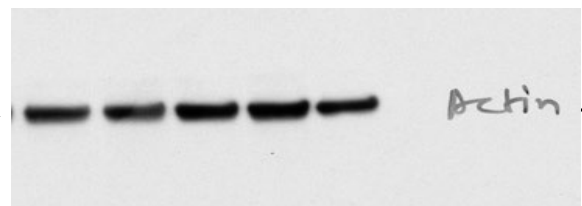

Fig.5: MKN-7 cells

Actin

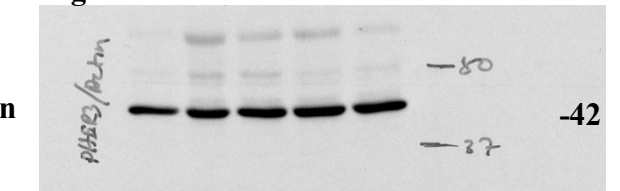

# Full-blot for Figure 5

Fig.5: N87 cells

P-HER3  
(pY1289)

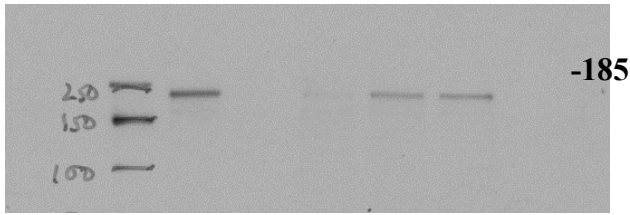

Fig.5: OE19 cells

P-HER3  
(pY1289)

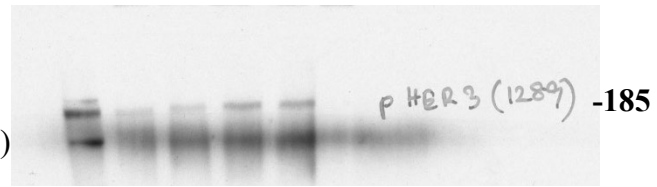

Fig.5: N87 cells

P-HER3  
(pY1197)

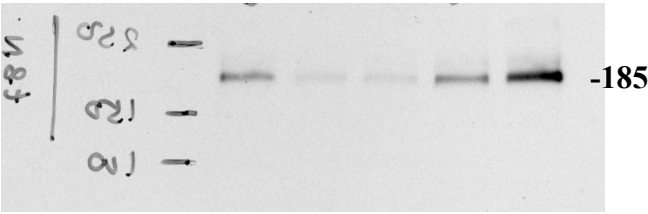

Fig.5: OE19 cells

P-HER3  
(pY1297)

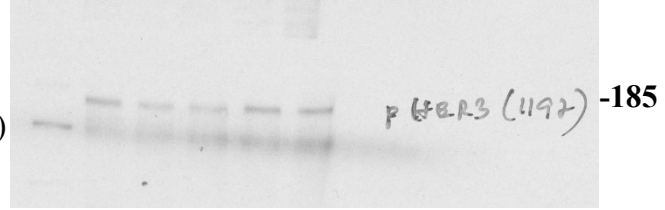

Fig.5: N87 cells

P-HER3  
(pY1222)

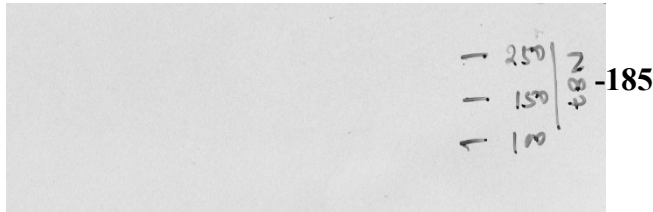

Fig.5: OE19 cells

P-HER3  
(pY1222)

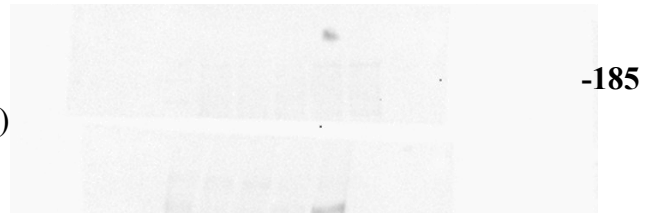

Fig.5: N87 cells

HER3

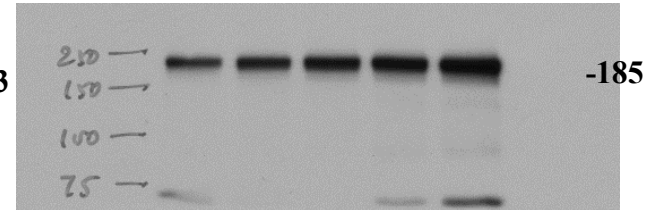

Fig.5: OE19 cells

HER3

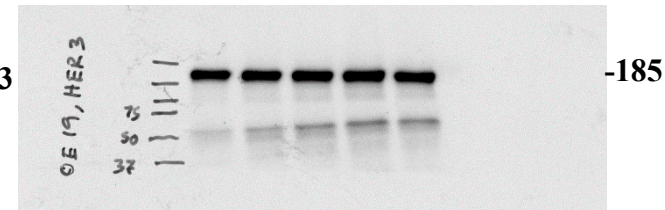

Fig.5: N87 cells

P-HER2  
(pY1248)

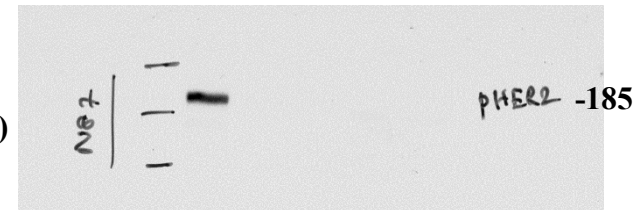

Fig.5: OE19 cells

P-HER2  
(pY1248)

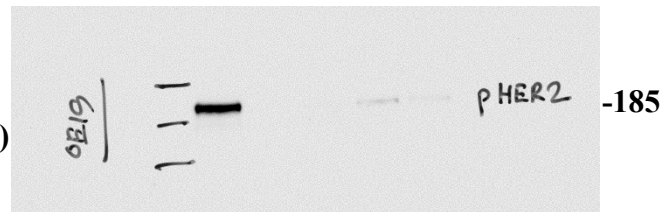

Fig.5: N87 cells

HER2

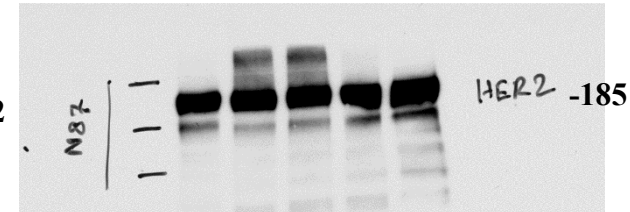

Fig.5: OE19 cells

HER2

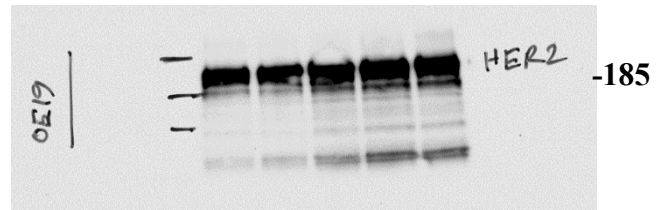

Actin

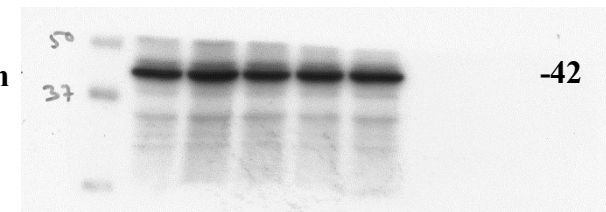

Actin

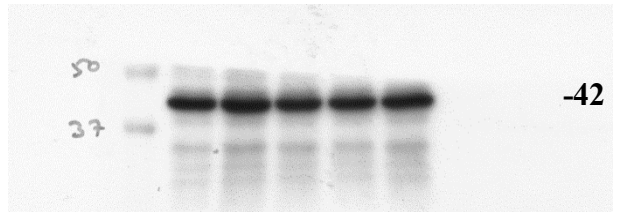



# Full-blot for Figure 5

Fig.5: TE-4 cells

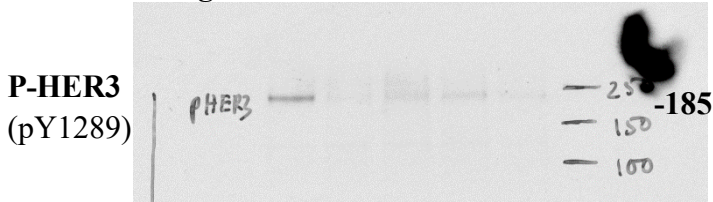

Fig.5: OE33 cells

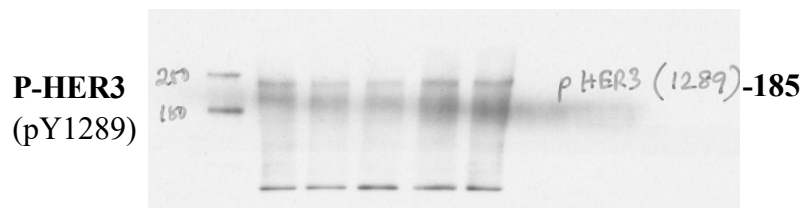

Fig.5: TE-4 cells

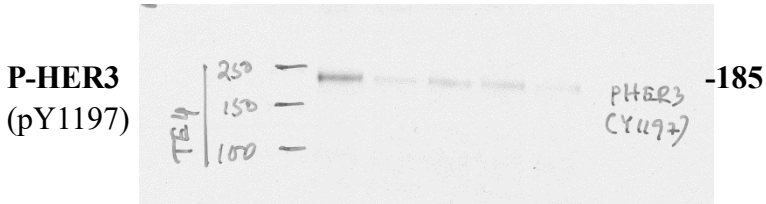

Fig.5: OE33 cells

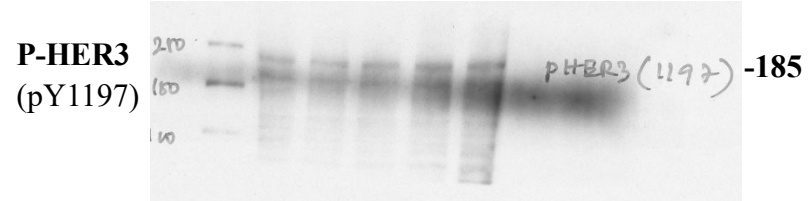

Fig.5: TE-4 cells

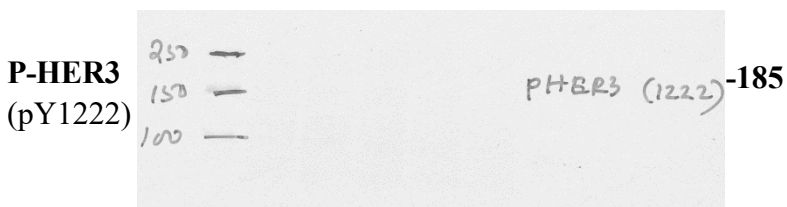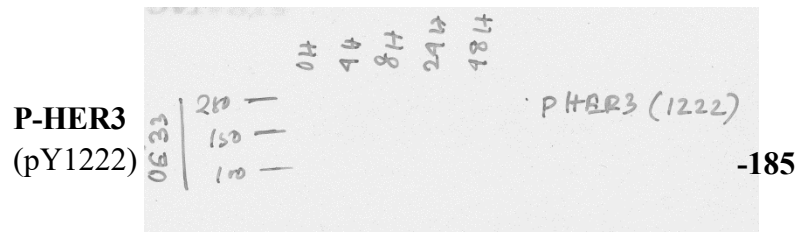

Fig.5: TE-4 cells

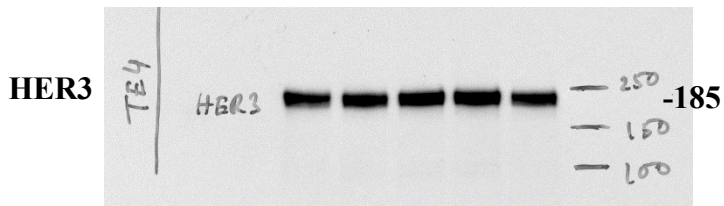

Fig.5: OE33 cells

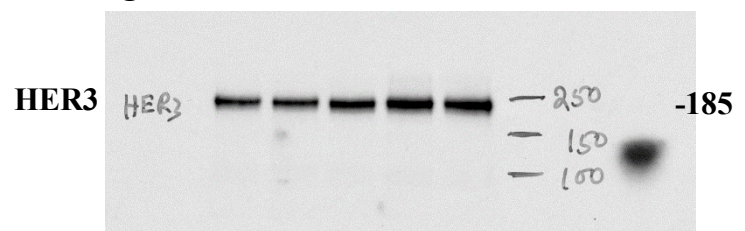

Fig.5: TE-4 cells

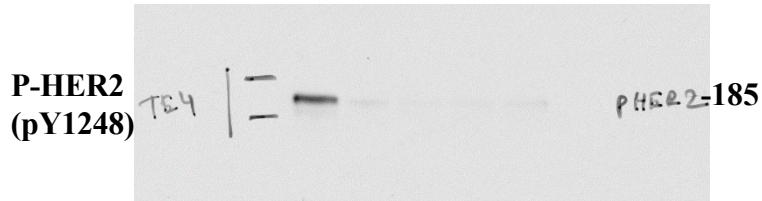

Fig.5: OE33 cells

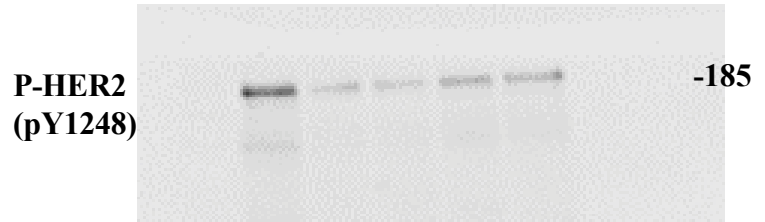

Fig.5: TE-4 cells

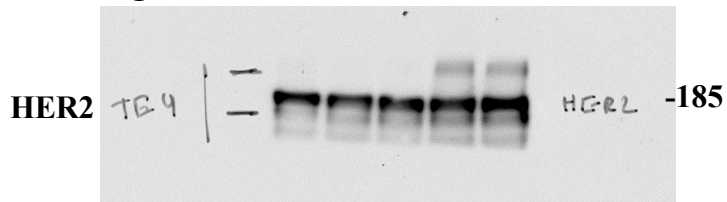

Fig.5: OE33 cells

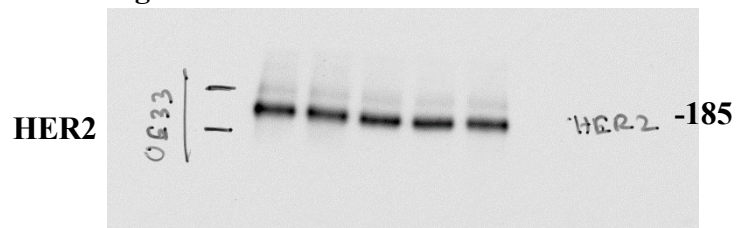

Fig.5: TE-4 cells

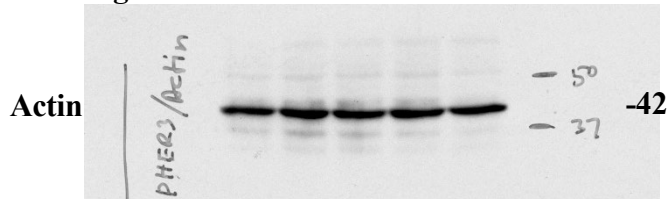

Fig.5: OE33 cells

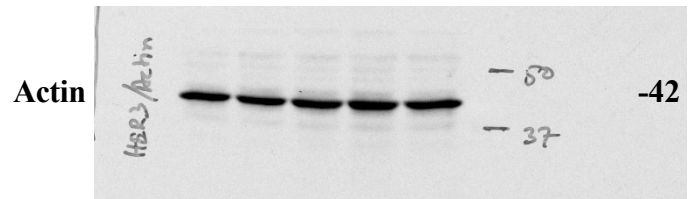

# Full-blot for Figure 5

Fig.5: KYSE-410 cells

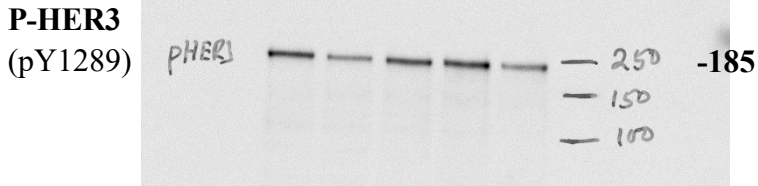

Fig.5: OE21 cells

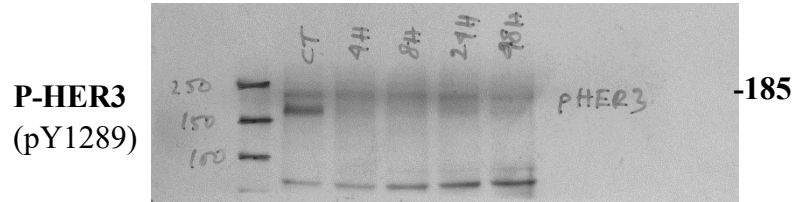

Fig.5: KYSE-410 cells

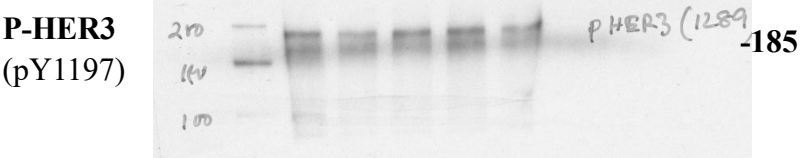

Fig.5: OE21 cells

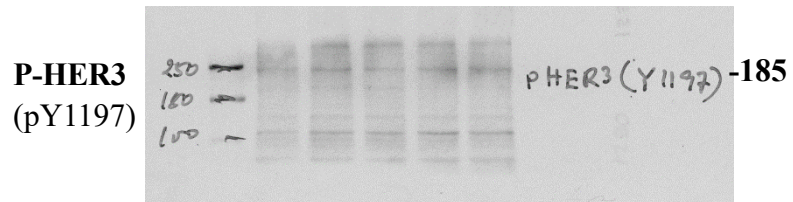

Fig.5: KYSE-410 cells

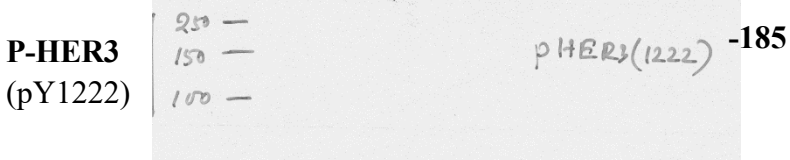

Fig.5: OE21 cells

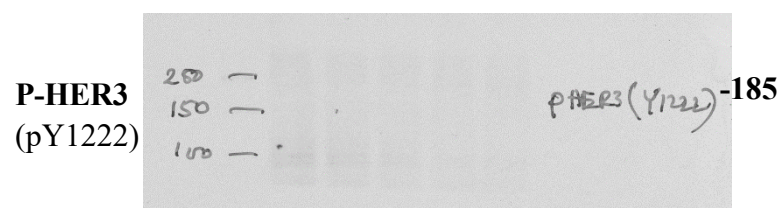

Fig.5: KYSE-410 cells

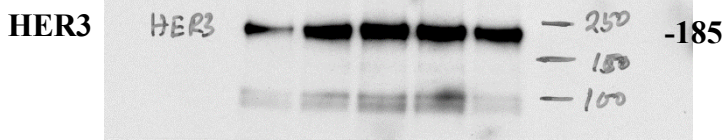

Fig.5: OE21 cells

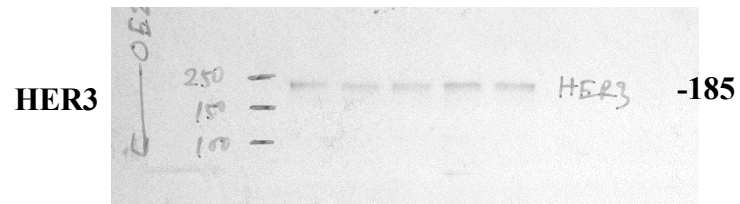

Fig.5: KYSE-410 cells

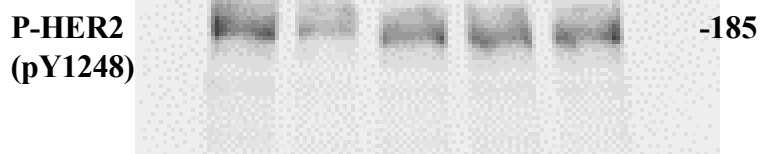

Fig.5: OE21 cells

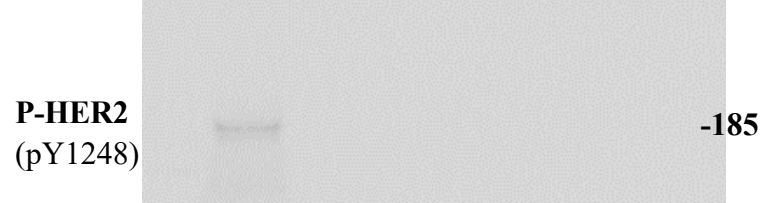

Fig.5: KYSE-410 cells

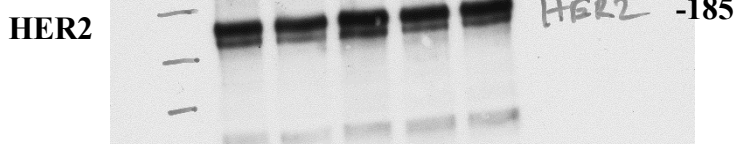

Fig.5: OE21 cells

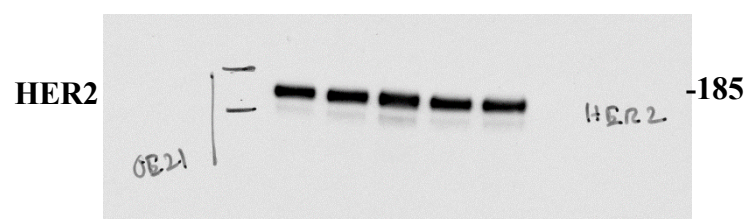

Fig.5: KYSE-410 cells

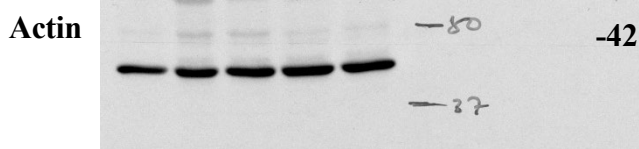

Fig.5: OE21 cells

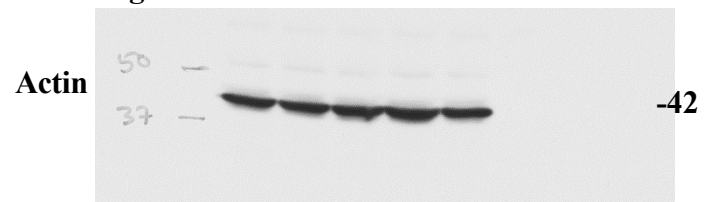

# Full-blot for Figure 5

**Fig.5: TE7 cells**

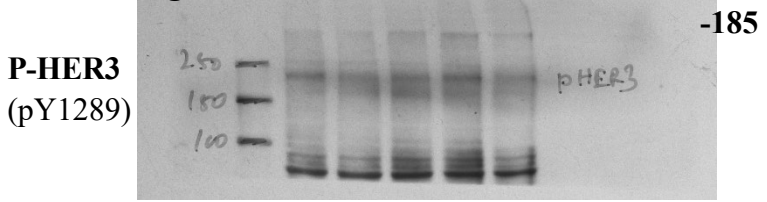

**Fig.5: Calu 3 cells**

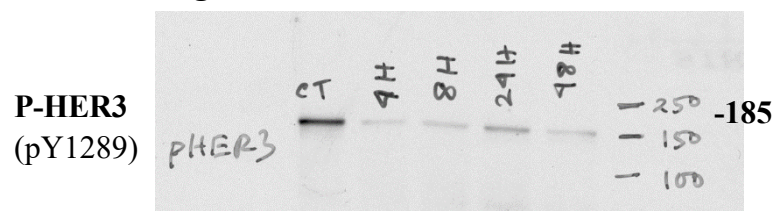

**Fig.5: TE7 cells**

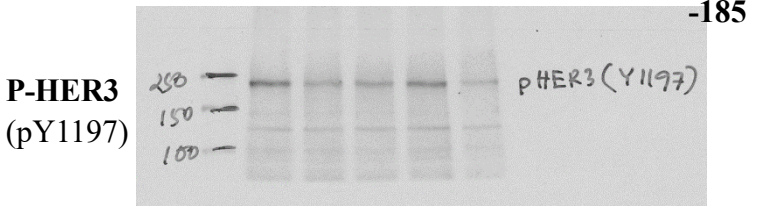

**Fig.5: Calu 3 cells**

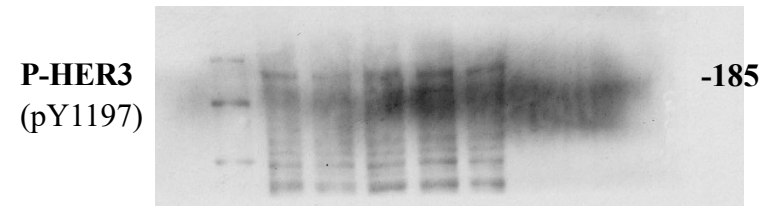

**Fig.5: TE7 cells**

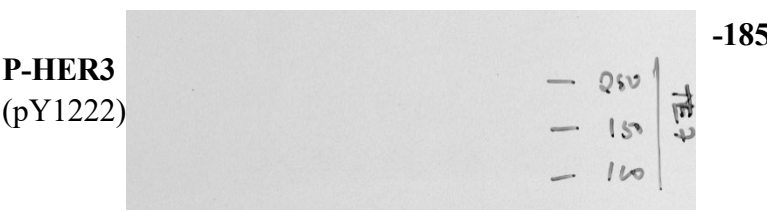

**Fig.5: Calu 3 cells**

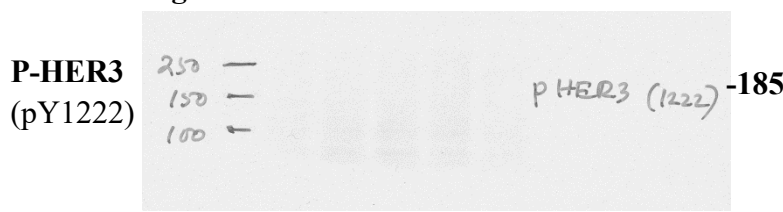

**Fig.5: TE7 cells**

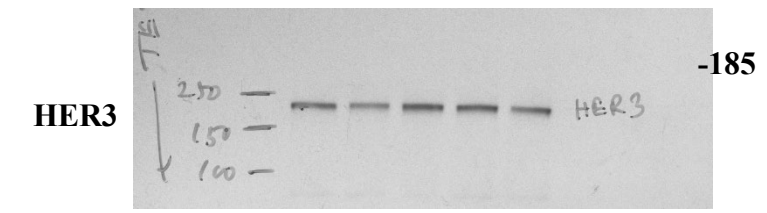

**Fig.5: Calu 3 cells**

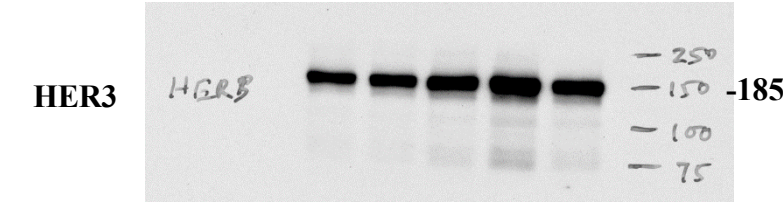

**Fig.5: TE7 cells**

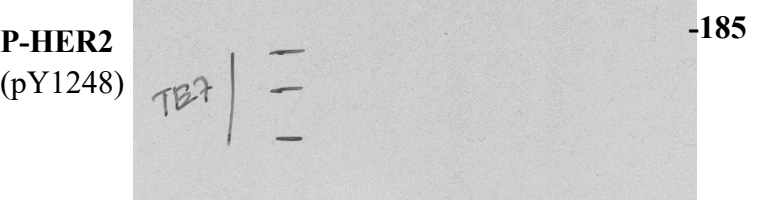

**Fig.5: Calu 3 cells**

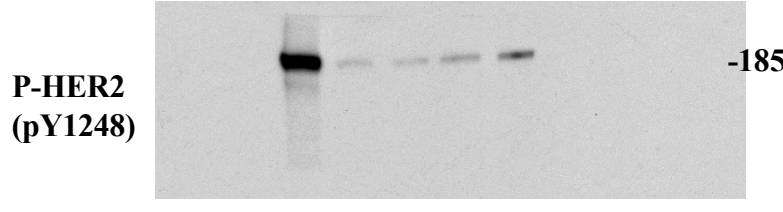

**Fig.5: TE7 cells**

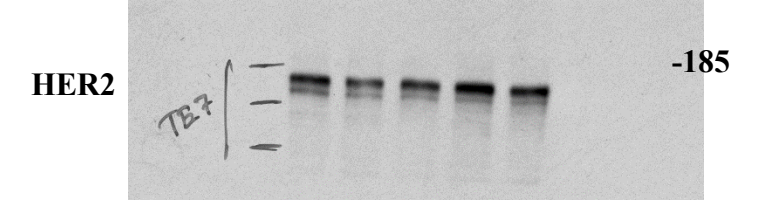

**Fig.5: Calu 3 cells**

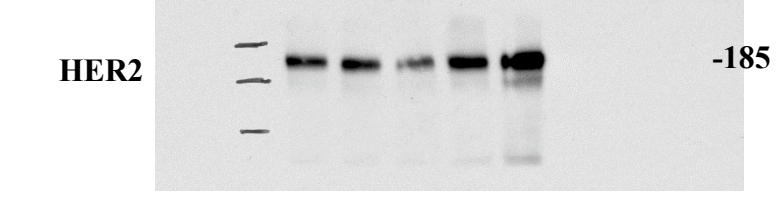

**Fig.5: TE7 cells**

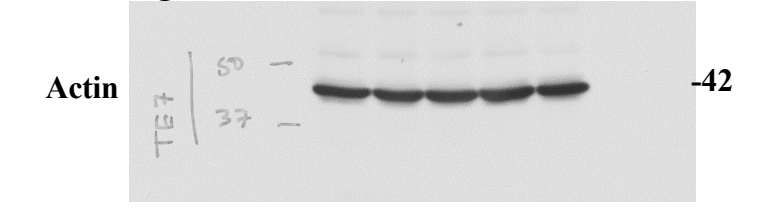

**Fig.5: Calu 3 cells**

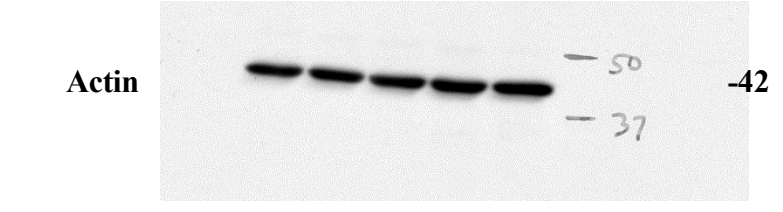

# Full-blot for Figure 5

Fig.5: VMRCLCP cells

P-HER3 (pY1289) *pHER3* -185

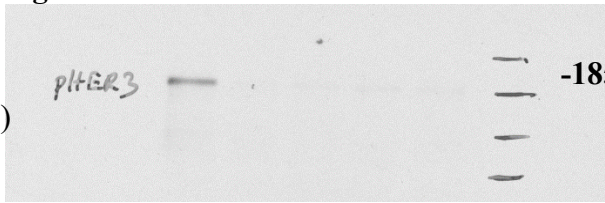

Fig.5: H2170 cells

P-HER3 (pY1289) -185

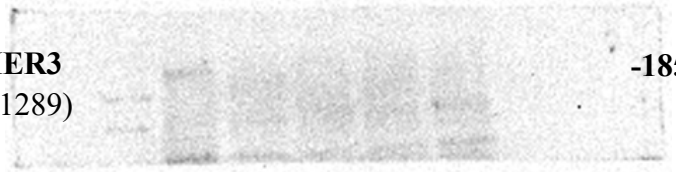

Fig.5: VMRCLCP cells

P-HER3 (pY1197) 250 — 150 — 100 — *pHER3 (1197)* -185

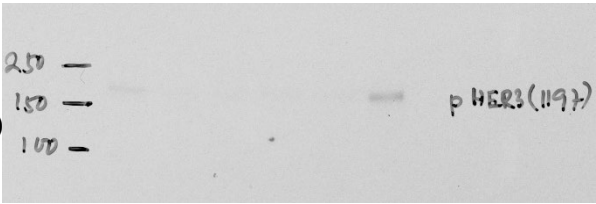

Fig.5: H2170 cells

P-HER3 (pY1197) -185

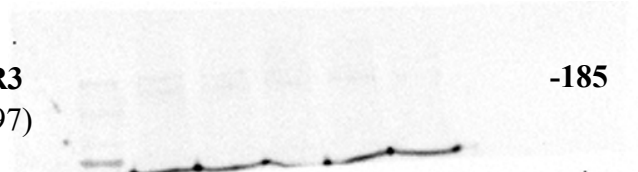

Fig.5: VMRCLCP cells

P-HER3 (pY1222) 250 — 150 — 100 — *pHER3 (1222)* -185

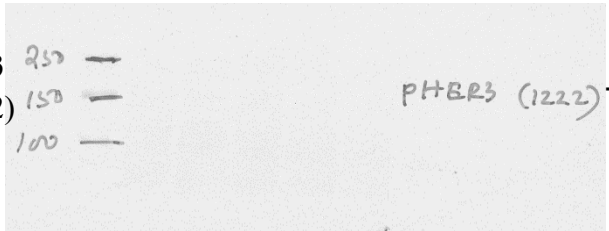

Fig.5: H2170 cells

P-HER3 (pY1222) 250 — 150 — 100 — -185

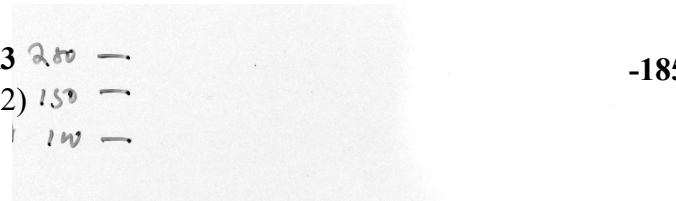

Fig.5: VMRCLCP cells

HER3 *HER3* -185

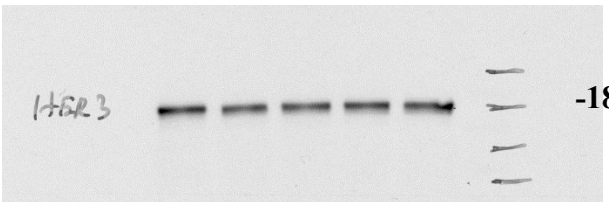

Fig.5: H2170 cells

HER3 -185

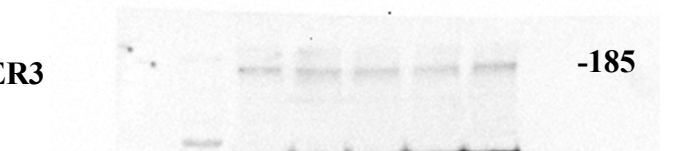

Fig.5: VMRCLCP cells

P-HER2 (pY1248) -185

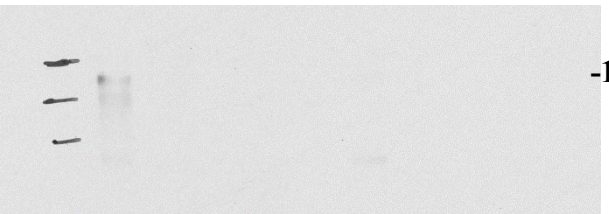

Fig.5: H2170 cells

P-HER2 (pY1248) -185

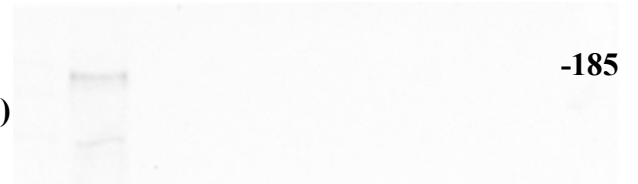

Fig.5: VMRCLCP cells

HER2 *VMR* -185

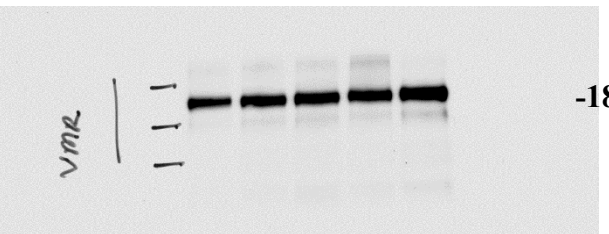

Fig.5: H2170 cells

HER2 -185

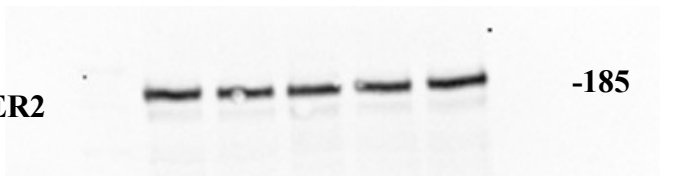

Fig.5: VMRCLCP cells

Actin 50 — 37 — -42

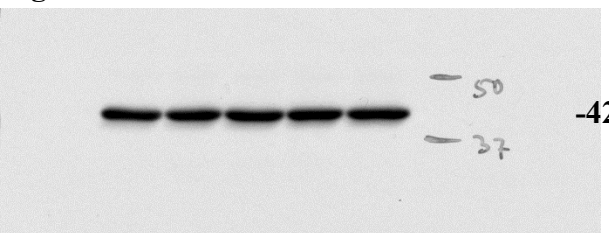

Fig.5: H2170 cells

Actin 50 — 37 — -42

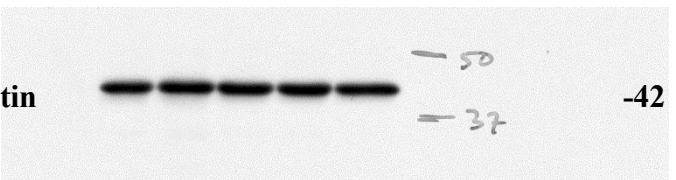

# Full-blot for Figure 5

Fig.5: BICR16 cells

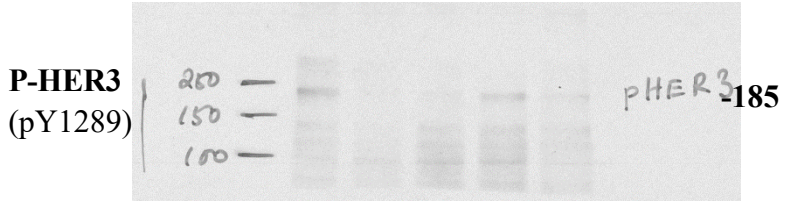

Fig.5: Cal27 cells

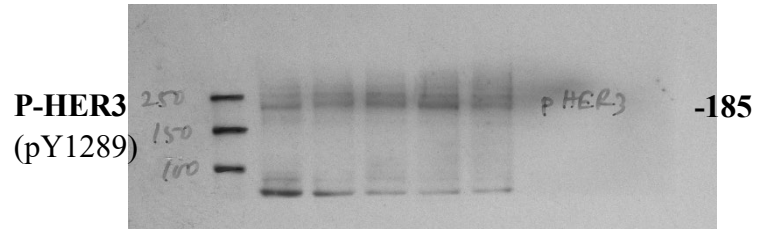

Fig.5: BICR16 cells

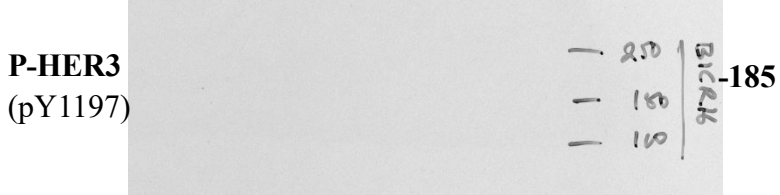

Fig.5: Cal27 cells

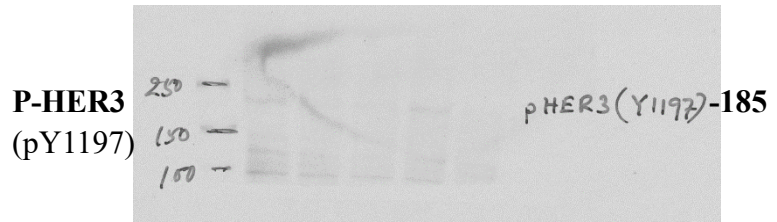

Fig.5: BICR16 cells

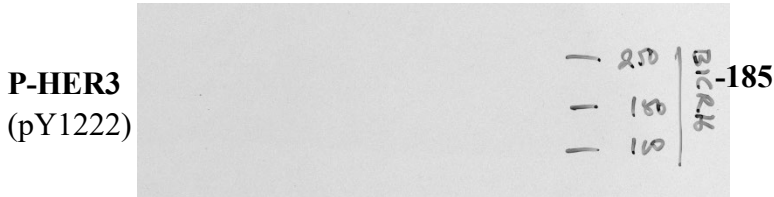

Fig.5: Cal27 cells

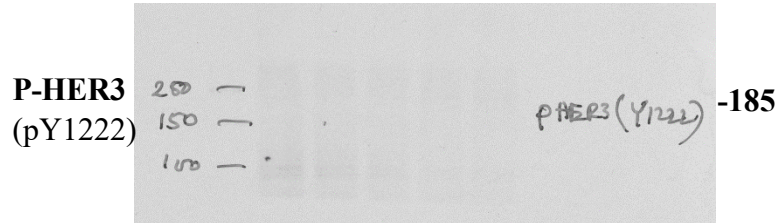

Fig.5: BICR16 cells

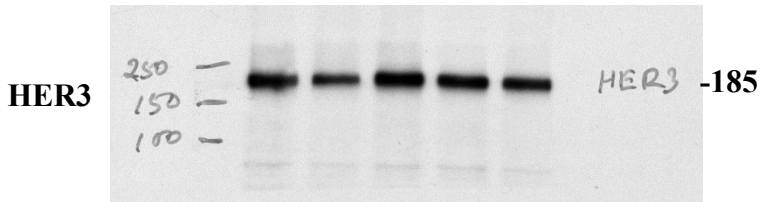

Fig.5: Cal27 cells

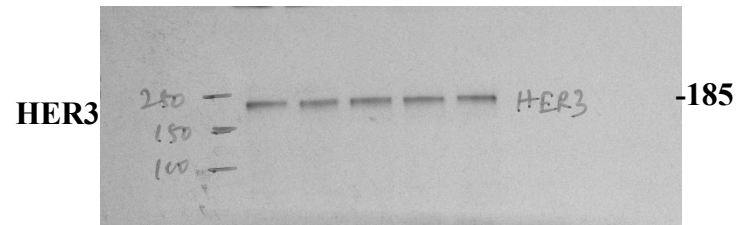

Fig.5: BICR16 cells

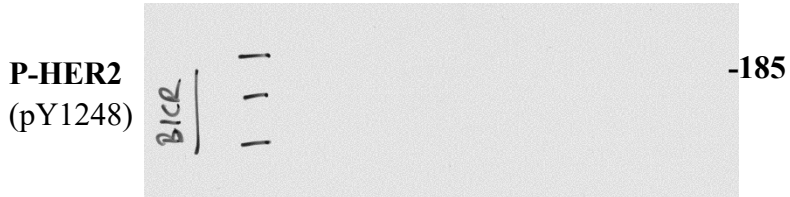

Fig.5: Cal27 cells

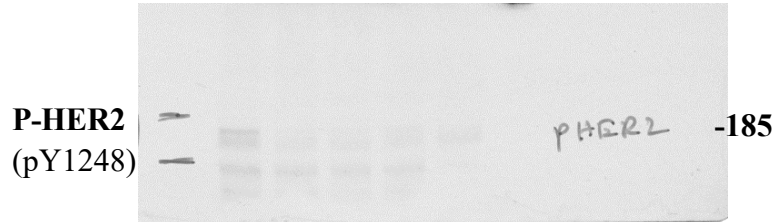

Fig.5: BICR16 cells

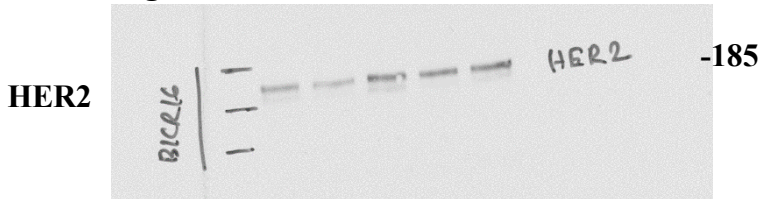

Fig.5: Cal27 cells

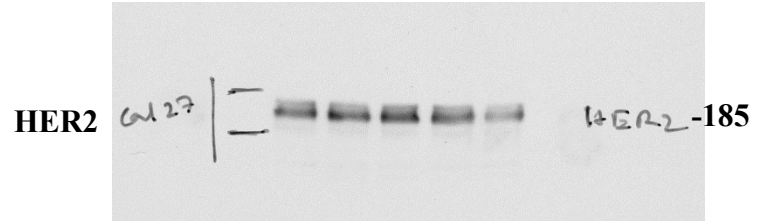

Fig.5: BICR16 cells

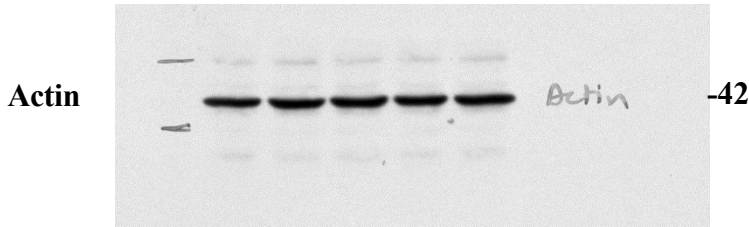

Fig.5: Cal27 cells

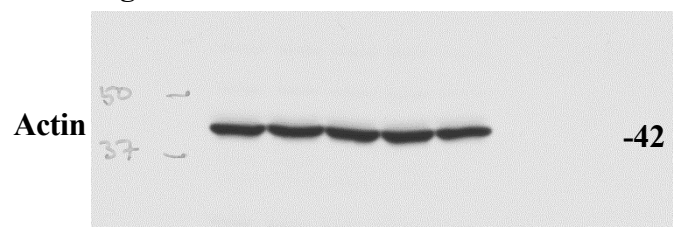

# Full-blot for Figure 5

Fig.5: TEN cells

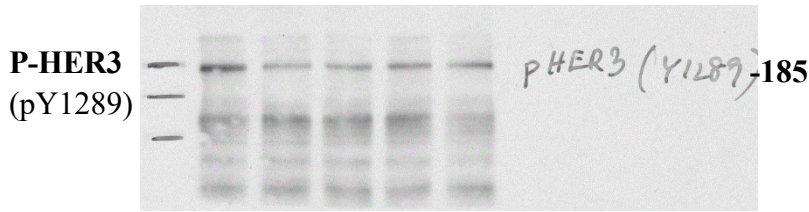

Fig.5: USPC-ARC1 cells

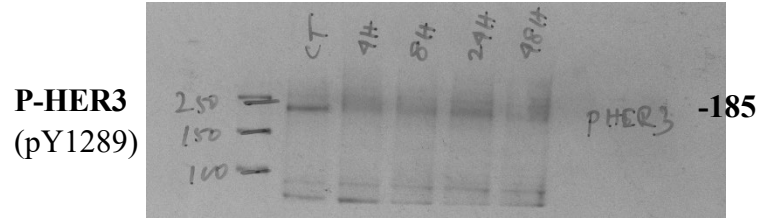

Fig.5: TEN cells

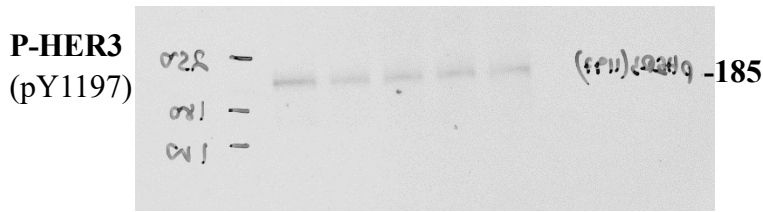

Fig.5: USPC-ARC1 cells

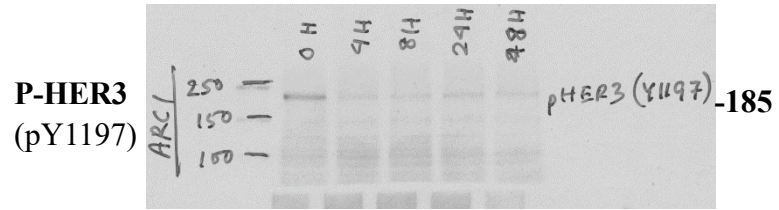

Fig.5: TEN cells

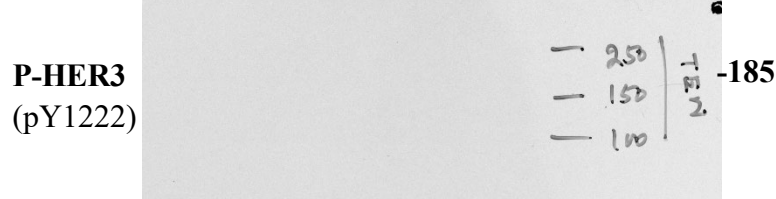

Fig.5: USPC-ARC1 cells

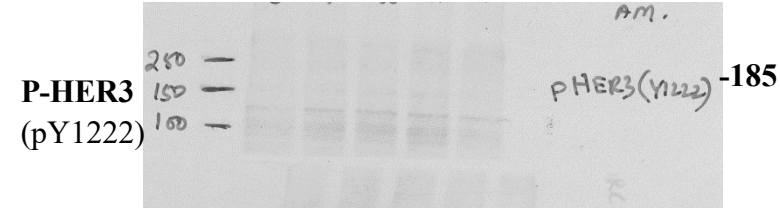

Fig.5: TEN cells

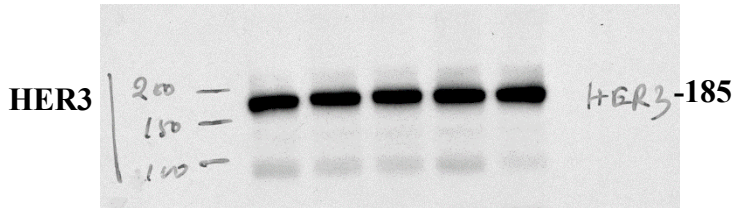

Fig.5: USPC-ARC1 cells

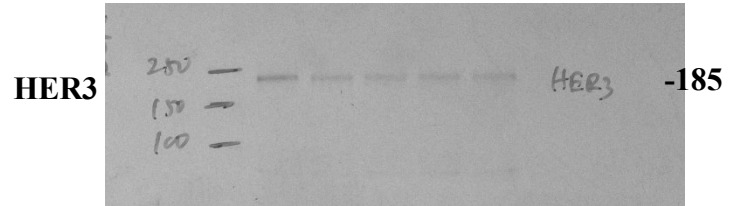

Fig.5: TEN cells

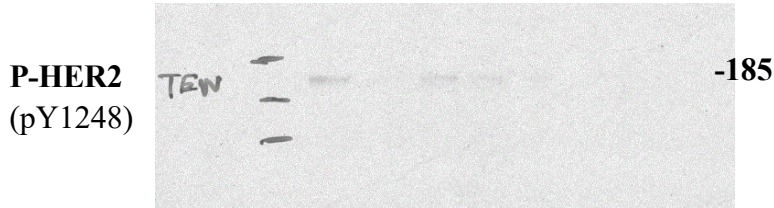

Fig.5: USPC-ARC1 cells

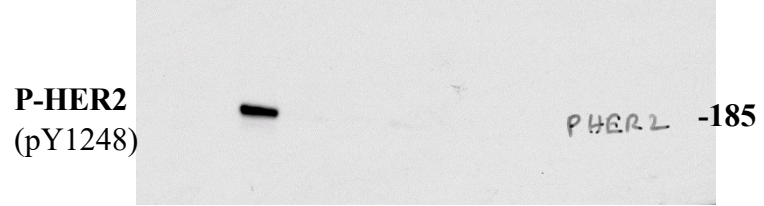

Fig.5: TEN cells

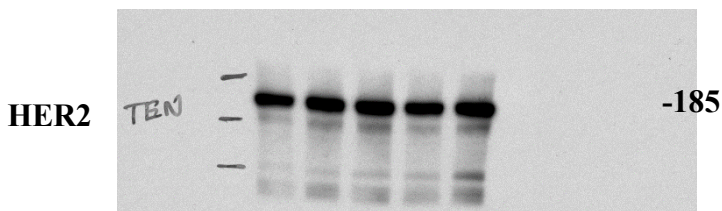

Fig.5: USPC-ARC1 cells

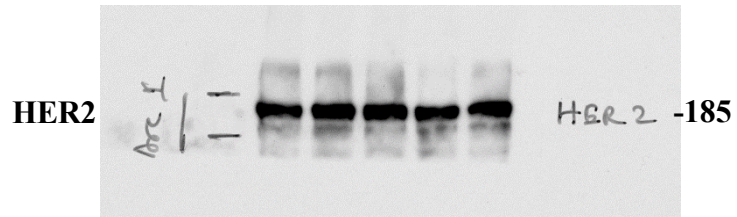

Fig.5: TEN cells

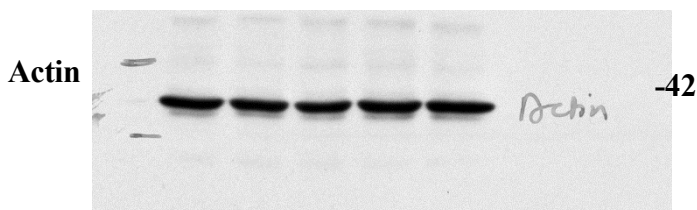

Fig.5: USPC-ARC1 cells

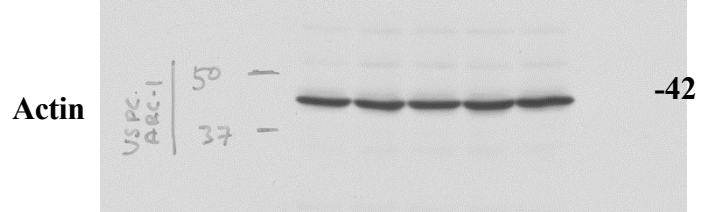

# Full-blot for Figure 5

Fig.5: USPC-ARC2 cells

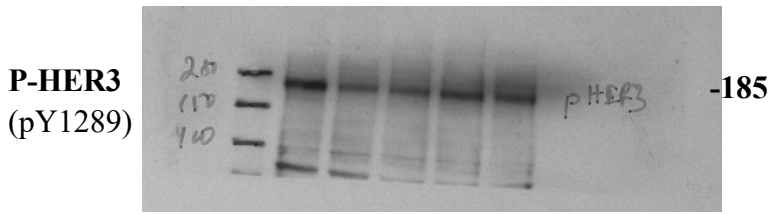

Fig.5: USPC-ARC4 cells

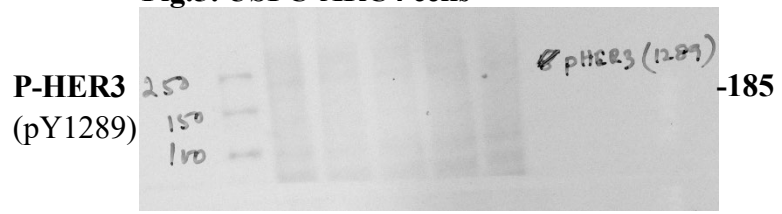

Fig.5: USPC-ARC2 cells

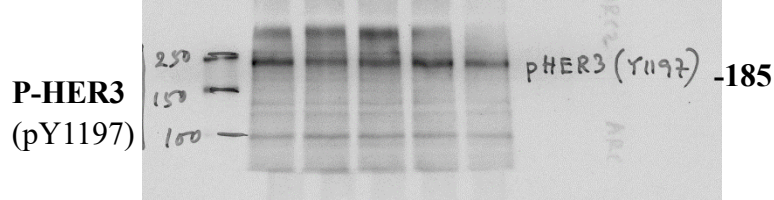

Fig.5: USPC-ARC4 cells

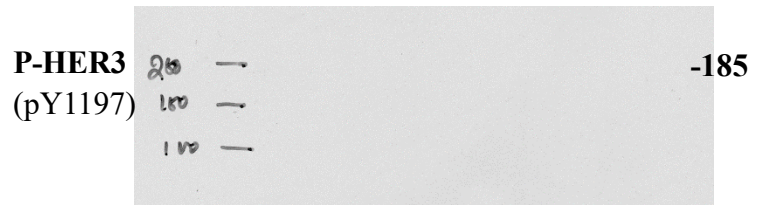

Fig.5: USPC-ARC2 cells

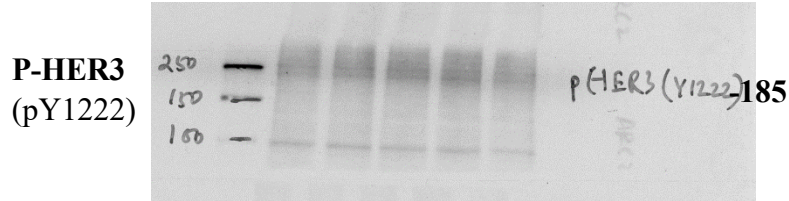

Fig.5: USPC-ARC4 cells

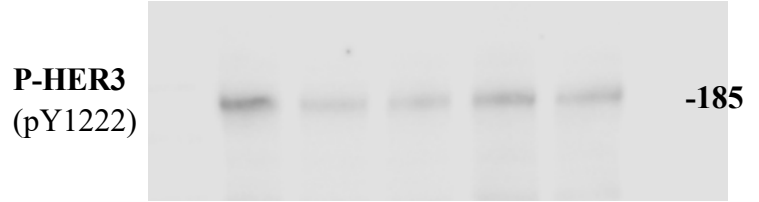

Fig.5: USPC-ARC2 cells

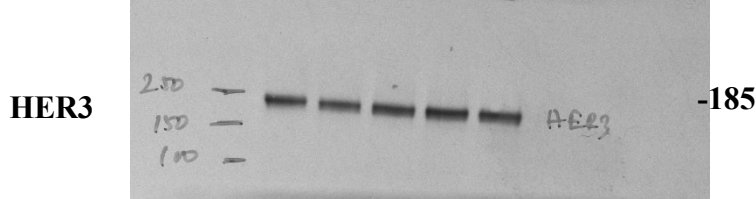

Fig.5: USPC-ARC4 cells

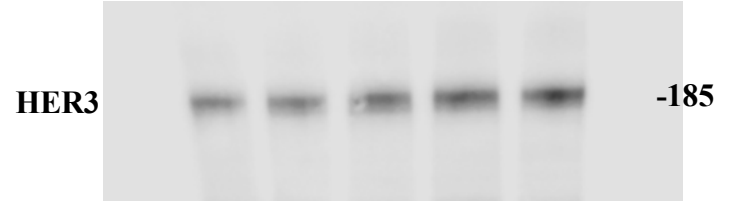

Fig.5: USPC-ARC2 cells

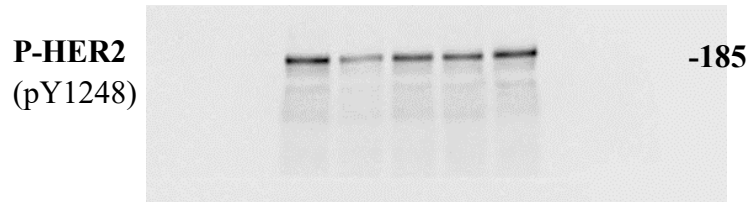

Fig.5: USPC-ARC4 cells

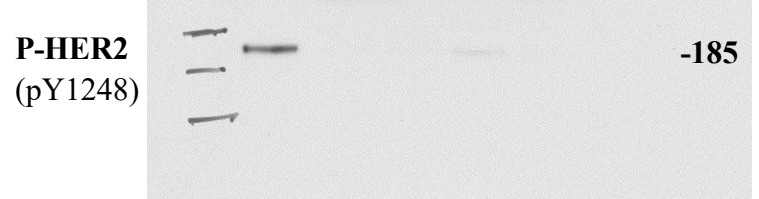

Fig.5: USPC-ARC2 cells

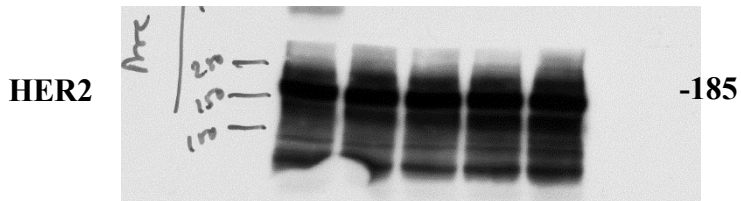

Fig.5: USPC-ARC4 cells

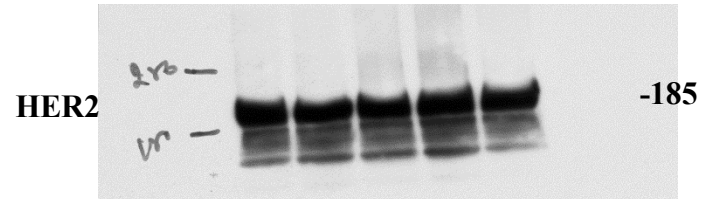

Fig.5: USPC-ARC2 cells

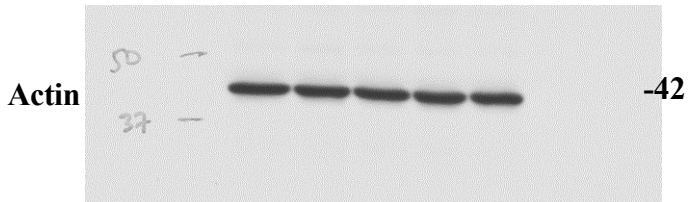

Fig.5: USPC-ARC4 cells

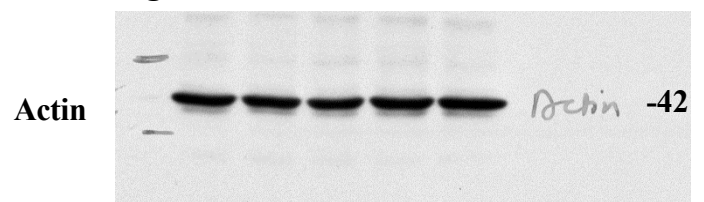

# Full blots for Figure 6

Fig. 6A: HER3

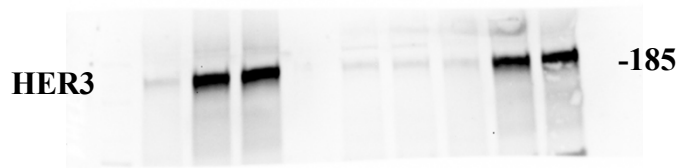

Fig. 6A: Actin

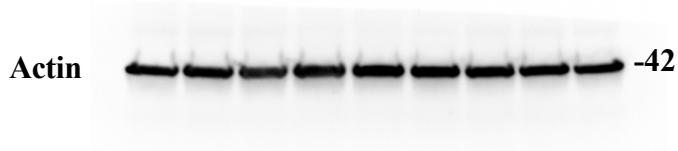

Fig. 6E: OE19 Tumors, HER3 blot

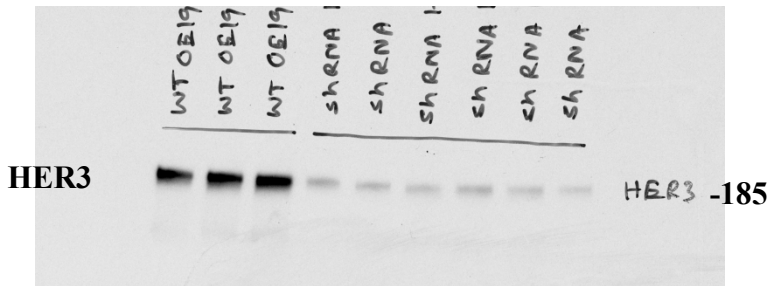

Fig. 6E: OE Tumors, Actin blot

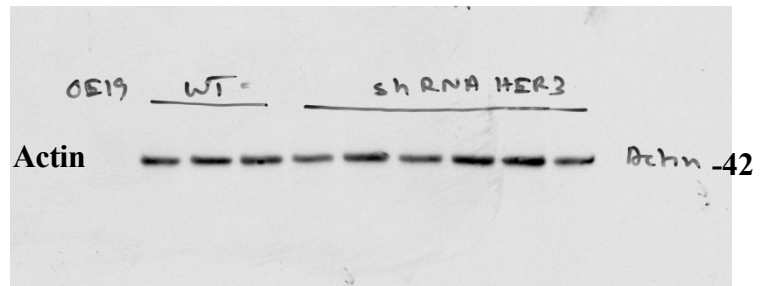

Fig. 6E: H2170 Tumors, HER3 blot

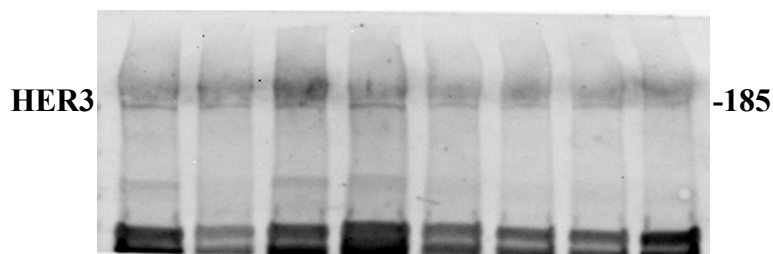

Fig. 6E: H2170 Tumors, Actin blot

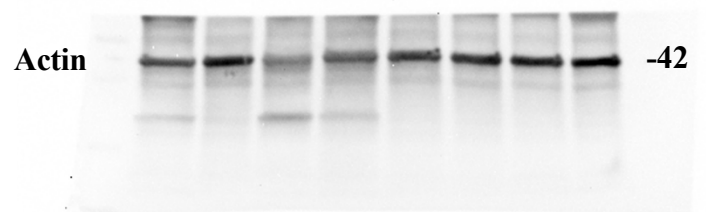

Fig. 6E: N87 Tumors, HER3 blot

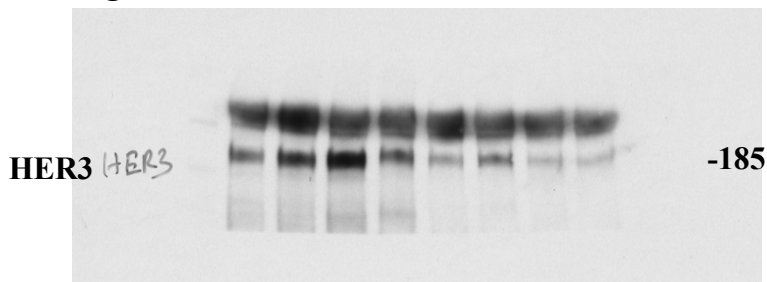

Fig. 6E: N87 Tumors, Actin blot

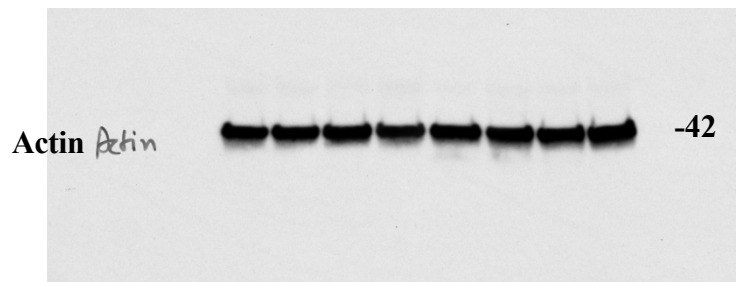

Supplement: 41598_2021_88683_MOESM1_ESM.pdf [file 41598_2021_88683_MOESM1_ESM.pdf]
